# Supplementary material for: A DFT+U revisit of reconstructed CeO2(100) surfaces: structures, thermostabilities and reactivities
Source: Royal Society of Chemistry journal article supplement (doi:10.1039/c9cp03408k), 2019-01-01
Supplement: c9cp03408k1.pdf [file c9cp03408k1.pdf]

## Supplementary Information

### A DFT+U revisit on reconstructed $\text{CeO}_2(100)$ surfaces: structures, thermostabilities and reactivities

Chong-Yuan Zhou, Dong Wang and Xue-Qing Gong\*

Key Laboratory for Advanced Materials, Centre for Computational Chemistry and Research Institute of Industrial Catalysis, School of Chemistry & Molecular Engineering, East China University of Science and Technology, 130 Meilong Road, Shanghai 200237, P.R. China

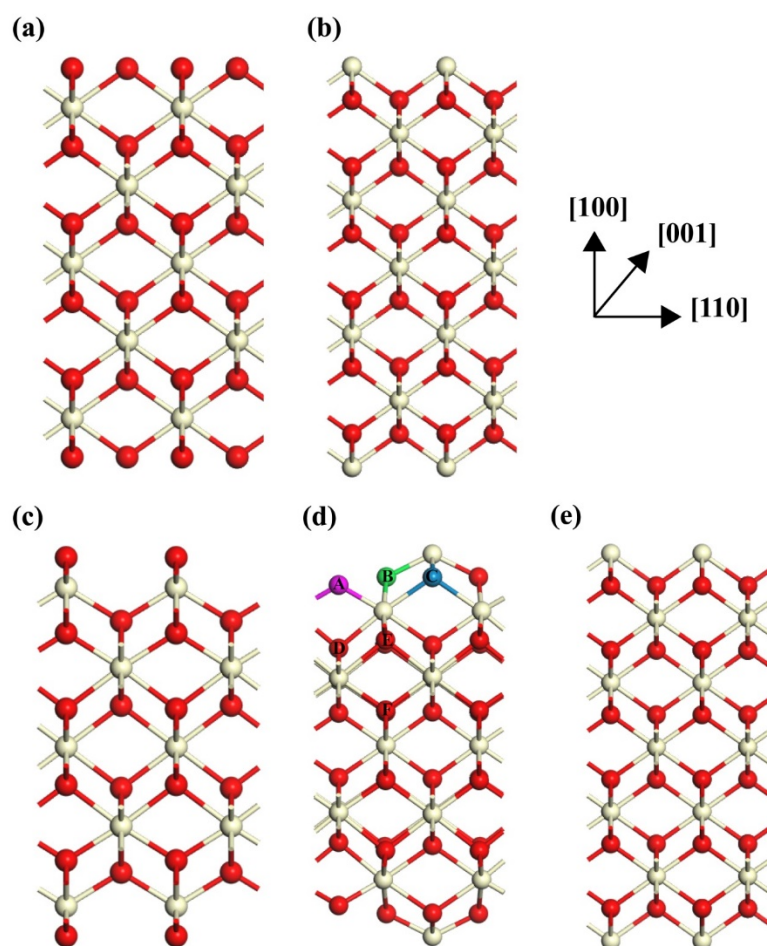

**Figure S1** Structures of the intact (a, b) and reconstructed (c-e)  $\text{CeO}_2(100)$  surfaces from the side views. (a) Intact  $\text{CeO}_2(100)$  with a full layer of surface O; (b) intact  $\text{CeO}_2(100)$  with a full layer of surface Ce; (c) reconstructed O-t surface with a half-layer of surface O; (d) reconstructed  $\text{CeO}_4$ -t surface modeled by introducing  $\text{CeO}_2$  units onto the O-t surface; (e) reconstructed Ce-t surface with a half-layer of surface Ce.

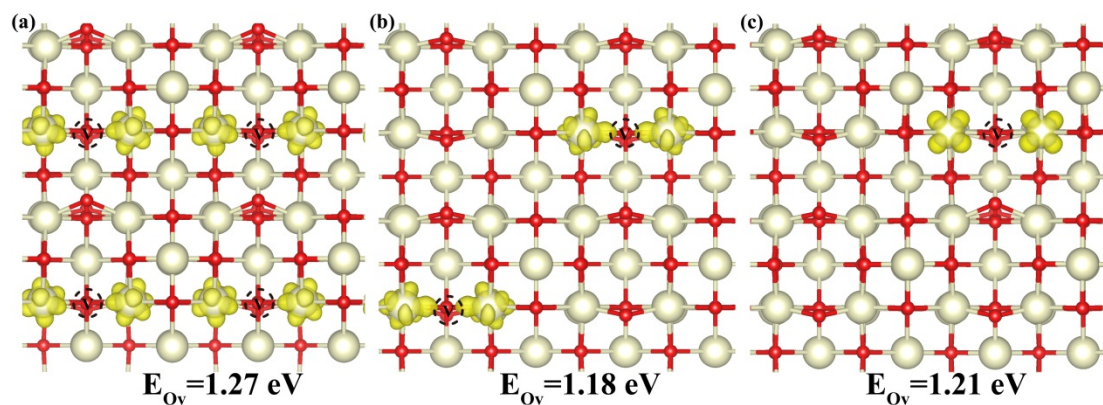

**Figure S2** Calculated spin charge plots and average  $E_{O_v}$  values (per  $O_v$ ) of  $O_v$  at the  $O^A$  site on the  $CeO_4$ -t surface using a  $p(4 \times 4)$  model at the  $O_v$  concentration of (a) 100%, (b) 50%, and (c) 25%, respectively.

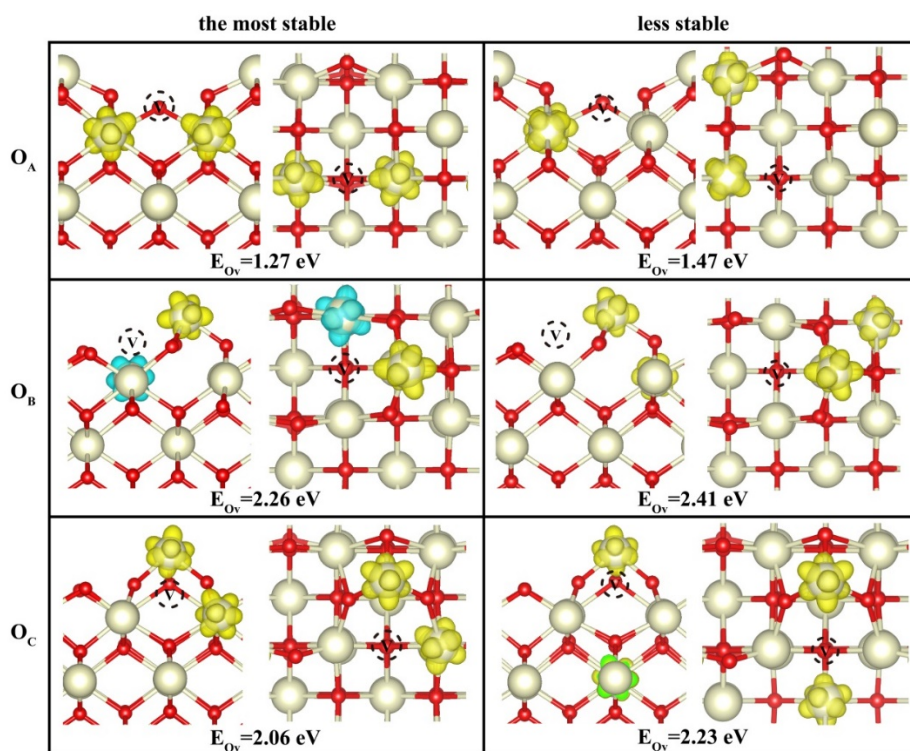

**Figure S3** Calculated spin charge plots (side and top views) of the reduced  $CeO_4$ -t surfaces with the  $O_v$  at the (top row)  $O^A$ , (middle)  $O^B$  and (bottom)  $O^C$  sites, respectively, with both the most and less stable electronic configurations for the distributions of the localized electrons.

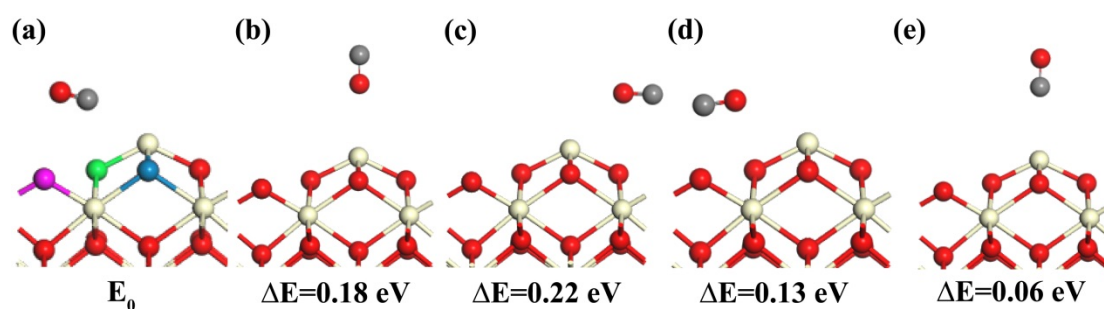

**Figure S4** Calculated structures and relative energies of CO adsorption on the CeO<sub>4</sub>-t surface. The calculated adsorption energy for CO at O<sup>B</sup> (a) is 0.28 eV and it is taken as the reference.

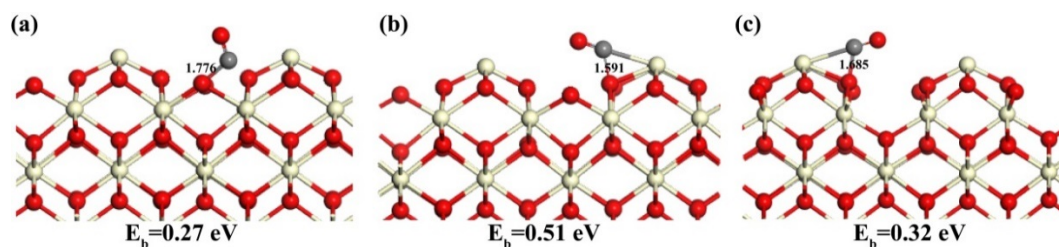

**Figure S5** Calculated structures of transition states of CO oxidation via the channel of the (a) O<sup>A</sup>, (b) O<sup>B</sup> and (c) O<sup>C</sup> on the CeO<sub>4</sub>-t surface using a  $p(4 \times 4)$  model. The corresponding reaction barriers are also listed.

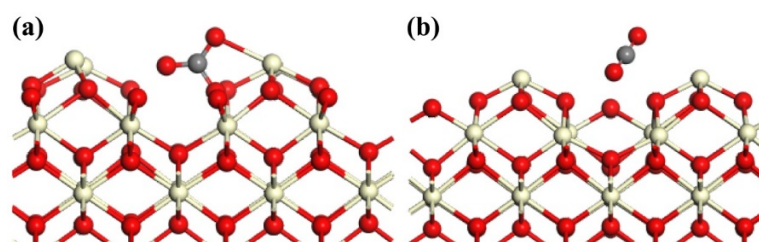

**Figure S6** Calculated structures of the (a) carbonates species formed via the O<sup>C</sup> channel and (b) the linear CO<sub>2</sub> via the O<sup>A</sup> channel using a  $p(4 \times 4)$  model.

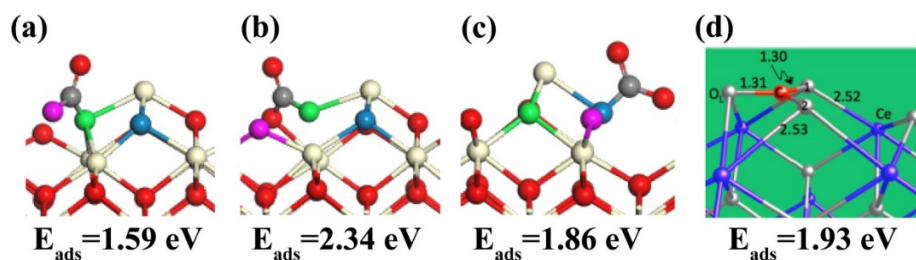

**Figure S7** Calculated formation energies and structures of the carbonate species on (a-c) the  $\text{CeO}_4\text{-t}$  type of reconstructed  $\text{CeO}_2(100)$  from our work and (d) on the  $\text{CeO}_2(100)$  surface reported by Mullins and co-workers. (ref. 39 in the main text).

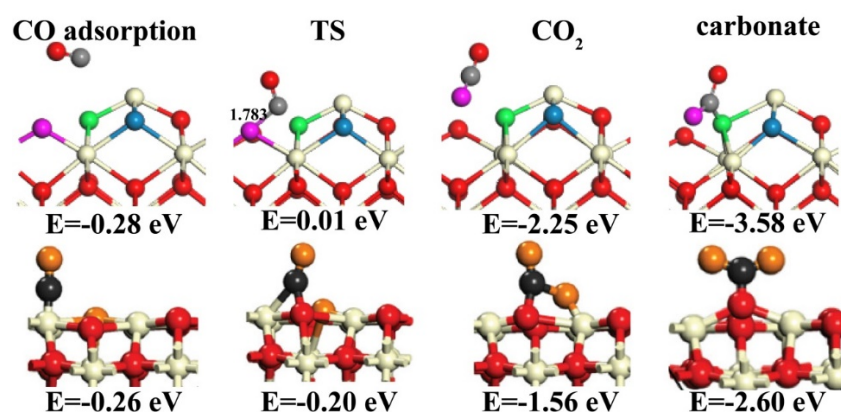

**Figure S8** Calculated structures and energetics of CO oxidation from our results on the  $\text{CeO}_4\text{-t}$  surface (top row) and the corresponding reverse processes of  $\text{CO}_2$  reduction on the defective  $\text{CeO}_2(110)$  reported by Lo and co-workers (bottom row; ref. 40 in the main text).
